# Supplementary material for: Single cell RNA-seq identifies a FOS/JUN-related monocyte signature associated with clinical response of heart failure patients with mesenchymal stem cell therapy
Source: publisher site journal article supplement (doi:10.18632/aging.205670), 2024-03-20
Supplement: Supplementary file [file aging-v16i6-205670-supplementary-material-SD2.pdf]

## SUPPLEMENTARY TABLES

**Supplementary Table 1. Analysis of changes of patients with the MSC therapy.**

|              | Patients         |           |                    |           | Total            | Test (p-value)                   |
|--------------|------------------|-----------|--------------------|-----------|------------------|----------------------------------|
|              | Response (N=2)   |           | Non-response (N=2) |           |                  |                                  |
|              | Patient 1        | Patient 2 | Patient 3          | Patient 4 |                  |                                  |
| LVEDV        | 3.6 (5.8)        |           | 0.1 (4.5)          |           | 1.9 (5.3)        | 0.2679 (Two Sample t-test)       |
| LVESV        | 12.4 (2.9)       |           | 4.7 (4.9)          |           | 8.5 (5.5)        | 0.0078 (Two Sample t-test)       |
| APTT         | 1.8 (6.5)        |           | -7.9 (14.4)        |           | -3.0 (11.8)      | 0.1611 (Two Sample t-test)       |
| NT-proBNP    | 15.6 [5.0;26.8]  |           | -21.4 [-60.5;4.1]  |           | 3.6 [-18.0;14.7] | 0.0707 (Welch Two Sample t-test) |
| CK-MB        | 22.1 (13.1)      |           | -11.0 (32.7)       |           | 5.5 (29.4)       | 0.0439 (Two Sample t-test)       |
| D2           | 60.3 [49.4;90.4] |           | 40.3 [36.4;51.8]   |           | 50.5 [37.4;59.6] | 0.1269 (Wilcoxon rank sum test)  |
| HSTNT        | 8.2 (14.4)       |           | 23.4 (17.3)        |           | 15.8 (17.1)      | 0.1292 (Two Sample t-test)       |
| 6WORLDJULIOM | 18.2 [13.6;18.2] |           | 2.4 [0.4;4.0]      |           | 8.4 [2.8;18.2]   | 0.0038 (Wilcoxon rank sum test)  |
| LVEF         | 34.3 (17.9)      |           | 20.8 (7.5)         |           | 27.5 (14.9)      | 0.1185 (Two Sample t-test)       |

For normally distributed data, it is described using the mean and standard deviation.

For non-normally distributed data, it is described using the median and quartiles.

R1: Increase and decrease rates of examination and test values one month after patient cell transplantation compared to baseline.

R3: Increase and decrease rates of examination and test values three months after patient cell transplantation compared to baseline.

R6: Increase and decrease rates of examination and test values six months after patient cell transplantation compared to baseline.

**Supplementary Table 2. Patient demographics.**

|                                                         | <b>Overall</b> | <b>Response</b> | <b>Non-response</b> | <b>p-value</b> |
|---------------------------------------------------------|----------------|-----------------|---------------------|----------------|
|                                                         | <b>N = 4</b>   | <b>N = 2</b>    | <b>N = 2</b>        |                |
| Age at Diagnosis                                        | 62.25 (5.91)   | 60.5 (7.78)     | 64 (5.66)           | 0.658          |
| Male                                                    | 4              | 2               | 2                   |                |
| Body mass index, kg/m <sup>2</sup>                      | 25.14 (1.2)    | 24.25 (1.07)    | 26.03 (0.06)        | 0.142          |
| Alcohol use                                             | 3              | 2               | 1                   |                |
| Tobacco use                                             | 1 (25%)        | 0 (0%)          | 1 (50%)             |                |
| Years since heart failure diagnosis                     | 5.75           | 5               | 6.5                 | 0.423          |
| Previous myocardial infarction                          | 1 (25%)        | 0 (0%)          | 1 (50%)             |                |
| Any type of defibrillator (AICD or CRT-D)               | 1 (25%)        | 0 (0%)          | 1 (50%)             |                |
| NHYA functional class                                   | 2.75 (0.5)     | 3 (0)           | 2.5 (0.71)          | 0.609          |
| History of hypertension                                 | 3 (75%)        | 1 (50%)         | 2 (100%)            |                |
| History of diabetes                                     | 1 (25%)        | 0 (0%)          | 1 (50%)             |                |
| History of atrial fibrillation                          | 1 (25%)        | 0 (0%)          | 1 (50%)             |                |
| Ventricular premature beats and ventricular tachycardia | 3 (75%)        | 1 (50%)         | 2 (100%)            |                |
| HbA1c                                                   | 5.98 (0.73)    | 5.5 (0.28)      | 6.45 (0.78)         | 0.246          |
| Diagnosis                                               |                |                 |                     |                |
| CDM                                                     | 3 (75%)        | 2 (100%)        | 1 (50%)             |                |
| CHD                                                     | 1 (25%)        | 0 (0%)          | 1 (50%)             |                |
| Mitral regurgitation                                    | 4 (100%)       | 2 (100%)        | 2 (100%)            |                |
| Tricuspid valve regurgitation                           | 1 (25%)        | 0 (0%)          | 1 (50%)             |                |
| Medications                                             |                |                 |                     |                |
| ARBs                                                    | 4 (100%)       | 2 (100%)        | 2 (100%)            |                |
| Diuretic agents                                         | 1 (25%)        | 0 (0%)          | 1 (50%)             |                |
| Beta-blockers                                           | 4 (100%)       | 2 (100%)        | 2 (100%)            |                |
| Digitalis                                               | 1 (25%)        | 0 (0%)          | 1 (50%)             |                |
| Oral anticoagulants                                     | 1 (25%)        | 0 (0%)          | 1 (50%)             |                |
| Anti-platelet agents                                    | 4 (100%)       | 2 (100%)        | 2 (100%)            |                |
| SGLT-2 inhibitors                                       | 1 (25%)        | 0 (0%)          | 1 (50%)             |                |
| Statins                                                 | 4 (100%)       | 2 (100%)        | 2 (100%)            |                |
| ECG                                                     |                |                 |                     |                |
| HR                                                      | 71.75 (9.25)   | 65 (7.07)       | 78.5(4.95)          | 0.157          |
| QRSD (ms)                                               | 94.75(11.18)   | 97(15.56)       | 92.5(10.61)         | 0.768          |
| QTJQ (ms)                                               | 395.25(37.02)  | 408(25.46)      | 382.5(53.03)        | 0.602          |
| Rv5/Sv1                                                 | 1.77(1.58)     | 3(1.18)         | 0.55(0.33)          | 0.106          |

For normally distributed data, it is described using the mean and standard deviation.

For non-normally distributed data, it is described using the median and quartiles.

**Supplementary Table 3. Potential drugs for targeting FOS.**

| Chemical name            | Chemical ID | CAS RN     | Interaction                                                                              | Interaction actions                     | Reference count | Organism count |
|--------------------------|-------------|------------|------------------------------------------------------------------------------------------|-----------------------------------------|-----------------|----------------|
| Cocaine                  | D003042     | 50-36-2    | Cocaine results in increased expression of FOS protein                                   | increases^expression                    | 31              | 4              |
| Haloperidol              | D006220     | 52-86-8    | Haloperidol results in increased expression of FOS protein                               | increases^expression                    | 17              | 3              |
| Cadmium                  | D002104     | 7440-43-9  | Cadmium results in increased expression of FOS mRNA                                      | increases^expression                    | 11              | 4              |
| Haloperidol              | D006220     | 52-86-8    | Haloperidol results in increased expression of FOS mRNA                                  | increases^expression                    | 10              | 1              |
| Tetrachlorodibenzodioxin | D013749     | 1746-01-6  | Tetrachlorodibenzodioxin results in increased expression of FOS mRNA                     | increases^expression                    | 10              | 3              |
| Ethinyl Estradiol        | D004997     | 57-63-6    | Ethinyl Estradiol results in increased expression of FOS mRNA                            | increases^expression                    | 9               | 5              |
| Cyclophosphamide         | D003520     | 50-18-0    | Cyclophosphamide results in increased expression of FOS protein                          | increases^expression                    | 8               | 1              |
| Nitroglycerin            | D005996     | 55-63-0    | Nitroglycerin results in increased expression of FOS protein                             | increases^expression                    | 8               | 2              |
| Cisplatin                | D002945     | 15663-27-1 | Cisplatin results in increased expression of FOS mRNA                                    | increases^expression                    | 7               | 3              |
| Clozapine                | D003024     | 5786-21-0  | Clozapine results in increased expression of FOS protein                                 | increases^expression                    | 7               | 3              |
| Clozapine                | D003024     | 5786-21-0  | Clozapine results in increased expression of FOS mRNA                                    | increases^expression                    | 6               | 1              |
| Cocaine                  | D003042     | 50-36-2    | Cocaine affects the expression of FOS mRNA                                               | affects^expression                      | 6               | 2              |
| Diethylstilbestrol       | D004054     | 56-53-1    | Diethylstilbestrol results in increased expression of FOS mRNA                           | increases^expression                    | 6               | 2              |
| Tetrachlorodibenzodioxin | D013749     | 1746-01-6  | Tetrachlorodibenzodioxin results in decreased expression of FOS mRNA                     | decreases^expression                    | 6               | 4              |
| Cocaine                  | D003042     | 50-36-2    | Cocaine affects the expression of FOS protein                                            | affects^expression                      | 5               | 2              |
| Lipopolysaccharides      | D008070     |            | Lipopolysaccharides results in increased expression of FOS mRNA                          | increases^expression                    | 5               | 1              |
| Lipopolysaccharides      | D008070     |            | Lipopolysaccharides results in increased expression of FOS protein                       | increases^expression                    | 5               | 2              |
| Particulate Matter       | D052638     |            | Particulate Matter results in increased expression of FOS mRNA                           | increases^expression                    | 5               | 3              |
| Resveratrol              | D000077185  |            | Resveratrol results in increased expression of FOS mRNA                                  | increases^expression                    | 5               | 1              |
| Cocaine                  | D003042     | 50-36-2    | SCH 23390 inhibits the reaction [Cocaine results in increased expression of FOS protein] | decreases^reaction[increases^expression | 4               | 1              |
| Methamphetamine          | D008694     | 537-46-2   | Methamphetamine results in increased expression of FOS protein                           | increases^expression                    | 4               | 2              |
| Carbachol                | D002217     |            | Carbachol results in increased expression of FOS protein                                 | increases^expression                    | 3               | 1              |
| Cisplatin                | D002945     | 15663-27-1 | Cisplatin results in increased expression of FOS protein                                 | increases^expression                    | 3               | 2              |
| Copper                   | D003300     | 7440-50-8  | Copper results in decreased expression of FOS mRNA                                       | decreases^expression                    | 3               | 2              |
| Doxorubicin              | D004317     | 23214-92-8 | Doxorubicin results in increased expression of FOS mRNA                                  | increases^expression                    | 3               | 2              |
| Isoproterenol            | D007545     | 7683-59-2  | Isoproterenol results in increased expression of FOS mRNA                                | increases^expression                    | 3               | 2              |
| Lipopolysaccharides      | D008070     |            | Lipopolysaccharides affects the localization of FOS protein                              | affects^localization                    | 3               | 2              |
| Lipopolysaccharides      | D008070     |            | Lipopolysaccharides results in decreased expression of FOS mRNA                          | decreases^expression                    | 3               | 2              |
| Lithium                  | D008094     | 7439-93-2  | Lithium results in increased expression of FOS protein                                   | increases^expression                    | 3               | 1              |
| Nitroprusside            | D009599     | 15078-28-1 | Nitroprusside affects the expression of FOS protein                                      | affects^expression                      | 3               | 1              |
| Nitroprusside            | D009599     | 15078-28-1 | Nitroprusside results in increased expression of FOS protein                             | increases^expression                    | 3               | 2              |
| Ozone                    | D010126     | 10028-15-6 | Ozone results in increased expression of FOS mRNA                                        | increases^expression                    | 3               | 1              |
| Pentobarbital            | D010424     | 76-74-4    | Pentobarbital results in decreased expression of FOS protein                             | decreases^expression                    | 3               | 1              |
| Pentobarbital            | D010424     | 76-74-4    | Pentobarbital results in increased expression of FOS protein                             | increases^expression                    | 3               | 1              |
| Resveratrol              | D000077185  |            | Resveratrol results in increased expression of FOS protein                               | increases^expression                    | 3               | 1              |
| Tamoxifen                | D013629     | 10540-29-1 | Tamoxifen results in increased expression of FOS mRNA                                    | increases^expression                    | 3               | 3              |
| Tretinoin                | D014212     | 302-79-4   | Tretinoin results in decreased expression of FOS mRNA                                    | decreases^expression                    | 3               | 3              |
